# Supplementary material for: The Associations between 24-Hour Movement Behaviours and Quality of Life in Preschoolers: A Compositional Analysis of Cross-Sectional Data from 2018–2021
Source: MDPI journal article supplement (doi:10.3390/ijerph192214969), 2022-11-14
Supplement: s1 [file s1]

## SMALLQ®

### **SURVEILLANCE OF DIGITAL MEDIA HABITS IN EARLY CHILDHOOD QUESTIONNAIRE**

(Outside of the preschool)

#### Survey Instructions

1. This survey is to be completed by **parents of preschool children aged 2 to 6 years**.
2. It will take about 20 minutes to complete.
3. Your answers are very important to us. There are no right or wrong answers.
4. If you have **more than a child in the centre**, please answer in relation to only **one child (i.e. Select only 1 child)**.
5. This survey will be repeated 12 and 24 months from now.

How much time does your child spend in preschool or kindergarten each weekday on an average?

- ☐ Less than 3 hours
- ☐ 3 to 5 hours
- ☐ More than 5 hours but less than 8 hours
- ☐ More than 8 hours
- ☐ Not applicable

This survey classifies digital media into six categories.

- 1) Television
- 2) Computer (e.g. desktops, laptops)
- 3) Mobile devices (e.g. smartphones, tablets)
- 4) Video game devices (e.g. console and handheld gaming players, virtual reality headset)
- 5) Blue-ray/DVD/CD/Videotape players
- 6) Intelligent/ technology toys (e.g. programmable toys)

## Segment I: Digital media use

### Digital environment at HOME

1. Which digital media(s) do you have at HOME now?

*You may tick more than one option*

|                                                                                              |                                                  |
|----------------------------------------------------------------------------------------------|--------------------------------------------------|
| Television                                                                                   | <input type="checkbox"/>                         |
| Computer (e.g. desktops, laptops)                                                            | <input type="checkbox"/>                         |
| Mobile devices (e.g. smartphones, tablets)                                                   | <input type="checkbox"/>                         |
| Video game devices<br>(e.g. console and handheld gaming players,<br>virtual reality headset) | <input type="checkbox"/>                         |
| Blu-ray/DVD/CD/Videotape players                                                             | <input type="checkbox"/>                         |
| Intelligent/ technology toys<br>(e.g. programmable toys)                                     | <input type="checkbox"/>                         |
| Others                                                                                       | <input type="checkbox"/> (please specify): _____ |

### YOUR digital media habits (all day)

2. **In the last 7 days**, how much time (in 1 day) do you spend using digital media?

*Indicate N/A where not applicable*

| Activity                                                     | On a typical<br>weekday                             | On a typical<br>weekend/ public holiday             |
|--------------------------------------------------------------|-----------------------------------------------------|-----------------------------------------------------|
| Work (e.g. reading documents,<br>checking emails)            | ___ hr ___ mins                                     | ___ hr ___ mins                                     |
| Entertainment (e.g. watching<br>shows, playing games)        | ___ hr ___ mins                                     | ___ hr ___ mins                                     |
| Social networking (e.g. browsing<br>social networking sites) | ___ hr ___ mins                                     | ___ hr ___ mins                                     |
| Personal development (e.g.<br>seeking for information)       | ___ hr ___ mins                                     | ___ hr ___ mins                                     |
| Others                                                       | ___ hr ___ mins<br>(please specify activity): _____ | ___ hr ___ mins<br>(please specify activity): _____ |

***YOUR CHILD'S first exposure to digital media***

3. At what age was your child first exposed to:

*Indicate N/A where not applicable*

- (a) fixed screens (television, desktop computer, etc.)

\_\_\_\_\_ Year(s) \_\_\_\_\_ month(s)

- (b) mobile screens (smartphone, tablet, handheld gaming players, etc.)

\_\_\_\_\_ Year(s) \_\_\_\_\_ month(s)

***Digital media habits of YOUR CHILD outside of kindergarten/childcare centre (e.g. home)***

4. Over the last 7 days, how frequent did your child use screen media?

*Please tick accordingly*

*Indicate N/A where not applicable*

|                                                                                                    | Never | 1-2 times<br>a week | 3-4 times<br>a week | 5-6 times<br>a week | 7-8<br>times a<br>week | 9 or<br>more<br>times a<br>week | N/A |
|----------------------------------------------------------------------------------------------------|-------|---------------------|---------------------|---------------------|------------------------|---------------------------------|-----|
| Television                                                                                         |       |                     |                     |                     |                        |                                 |     |
| Computer (e.g.<br>desktops, laptops)                                                               |       |                     |                     |                     |                        |                                 |     |
| Mobile devices (e.g.<br>smartphones, tablets)                                                      |       |                     |                     |                     |                        |                                 |     |
| Video game devices<br>(e.g. console<br>and handheld gaming<br>players,<br>virtual reality headset) |       |                     |                     |                     |                        |                                 |     |
| Blu-<br>ray/DVD/CD/Videotape                                                                       |       |                     |                     |                     |                        |                                 |     |
| Intelligent/ technology<br>toys (e.g.<br>programmable toys)                                        |       |                     |                     |                     |                        |                                 |     |
| Others<br>(please specify):<br>_____                                                               |       |                     |                     |                     |                        |                                 |     |

5. Time spent on digital media by **YOUR CHILD outside of kindergarten/childcare centres (e.g. home)**

**In the last 7 days**, how much time does your child spend (in 1 day) using digital media?

*Indicate N/A where not applicable*

| Activity                                                                                                          | On a typical<br>weekday                       | On a typical<br>weekend/ public holiday       |
|-------------------------------------------------------------------------------------------------------------------|-----------------------------------------------|-----------------------------------------------|
| Using media for education/<br>learning<br>(e.g. reading digital e-book,<br>learning math via educational<br>apps) | ___ hr ___ mins                               | ___ hr ___ mins                               |
| Using media for<br>entertainment<br>(e.g. watching movies,<br>clips, playing games,<br>listening to music)        | ___ hr ___ mins                               | ___ hr ___ mins                               |
| Creating media<br>(e.g. Creating new apps, programming<br>robots/ interactive toys)                               | ___ hr ___ mins                               | ___ hr ___ mins                               |
| Communicating<br>(e.g. chatting with relatives via<br>facetime/ skype)                                            | ___ hr ___ mins                               | ___ hr ___ mins                               |
| Others                                                                                                            | ___ hr ___ mins<br>(please specify activity): | ___ hr ___ mins<br>(please specify activity): |

***YOUR digital media engagement with your child***

6. When your child uses media, estimate the amount of time you are engaged with him/ her (e.g. interacting with your child while watching videos together)

*Take the total time your child spends using digital media to be 100%*

On a typical **weekday in the last 7 days**: \_\_\_ %

On a typical **weekend/public holiday in the last 7 days**: \_\_\_ %

**Importance of digital media use to *YOU AND YOUR CHILD***

7. Please indicate how important using digital media is to you and your child:

*Please tick accordingly*

*Indicate N/A where not applicable*

| <b>Importance to your child</b>                                                                           |               |                      |                      |           |                |
|-----------------------------------------------------------------------------------------------------------|---------------|----------------------|----------------------|-----------|----------------|
|                                                                                                           | Not important | Of little importance | Moderately important | Important | Very important |
| Improve knowledge & skills<br>(e.g. listening, reading, writing, counting)                                |               |                      |                      |           |                |
| Entertainment<br>(e.g. keep my child happy)                                                               |               |                      |                      |           |                |
| Communication (e.g. chat with relatives via skype)                                                        |               |                      |                      |           |                |
| <b>Importance to you</b>                                                                                  |               |                      |                      |           |                |
|                                                                                                           | Not important | Of little importance | Moderately important | Important | Very important |
| Keep child occupied<br>(e.g. when entertaining guests, on long travels)                                   |               |                      |                      |           |                |
| Distract or divert child's attention<br>(e.g. coax child to eat during mealtimes, stop child from crying) |               |                      |                      |           |                |
| Put child to sleep<br>(e.g. listening to lullaby)                                                         |               |                      |                      |           |                |
| Others<br>(please specify):                                                                               |               |                      |                      |           |                |

***YOUR concerns with your child's digital media use***

8. How concerned are you with your child's digital media use in relation to:

*Please tick accordingly*

*Indicate N/A where not applicable*

|                                                                 | Not concerned | Minimally concerned | Somewhat concerned | Concerned | Seriously Concerned |
|-----------------------------------------------------------------|---------------|---------------------|--------------------|-----------|---------------------|
| Poor sleep                                                      |               |                     |                    |           |                     |
| Poor eyesight                                                   |               |                     |                    |           |                     |
| Lack of physical exercise and play                              |               |                     |                    |           |                     |
| Exposure to inappropriate content (e.g. violence, bad language) |               |                     |                    |           |                     |
| Addiction (using too much that it affects normal function)      |               |                     |                    |           |                     |
| Lack of parent-child interaction                                |               |                     |                    |           |                     |
| Others (please specify):<br>_____                               |               |                     |                    |           |                     |

***Guidelines on digital media use for children***

9. There are guidelines on digital media habits for children. Select the appropriate option:

*Indicate N/A where not applicable*

|                                                                                                        | I am not aware | I am not aware BUT practising | I am aware BUT do not practise | I am aware and practising |
|--------------------------------------------------------------------------------------------------------|----------------|-------------------------------|--------------------------------|---------------------------|
| Limit digital media use for children younger than 2 years                                              |                |                               |                                |                           |
| Limit screen time to 1 hour per day for children 2-5 years                                             |                |                               |                                |                           |
| Introduce only high-quality educational programs for children 1.5-2 years                              |                |                               |                                |                           |
| Co-watch or co-play digital media with child (e.g. discuss about what your child and you are watching) |                |                               |                                |                           |
| Others (please elaborate):<br>_____                                                                    |                |                               |                                |                           |

## Segment II: Non-digital behaviour

*Non-digital media habits of **YOUR CHILD** outside of kindergarten/childcare centres (e.g. home). We are interested in how your child spends his/her time when **NOT** using digital media.*

10. In the last 7 days, how much time does your child spend (in a day) in the following activities?

*Indicate N/A where not applicable*

| Activity                                                                                     | On a typical<br>weekday                             | On a typical<br>weekend/ public holiday             |
|----------------------------------------------------------------------------------------------|-----------------------------------------------------|-----------------------------------------------------|
| Taking afternoon naps                                                                        | ___ hr ___ mins                                     | ___ hr ___ mins                                     |
| Reading printed books                                                                        | ___ hr ___ mins                                     | ___ hr ___ mins                                     |
| Drawing/ painting/ sketching on paper/ others forms of craftwork                             | ___ hr ___ mins                                     | ___ hr ___ mins                                     |
| Helping with simple household chores                                                         | ___ hr ___ mins                                     | ___ hr ___ mins                                     |
| Indoor play<br>(e.g. dancing, crawling, playing board games, playing with manipulative toys) | ___ hr ___ mins                                     | ___ hr ___ mins                                     |
| Outdoor physical play<br>(e.g. playing 'hide-and-seek' or 'catching' in a playground)        | ___ hr ___ mins                                     | ___ hr ___ mins                                     |
| Others                                                                                       | ___ hr ___ mins<br>(please specify activity): _____ | ___ hr ___ mins<br>(please specify activity): _____ |

11. In relation to Question 10, estimate the percentage of time spent on indoor and outdoor physical play that caused your child to breathe faster and harder.  
*Take the total time your child spends in physical activity to be 100%*

On a typical **weekday in the last 7 days**: \_\_\_\_ %

On a typical **weekend/public holiday in the last 7 days**: \_\_\_\_ %

***YOUR physical play engagement with your child***

12. Estimate the percentage of time you engaged with your child in indoor and outdoor physical play (e.g. playing 'hide-and-seek' or 'catching' together)  
*Take the total time your child spends in physical play to be 100%*

On a typical **weekday in the last 7 days**: \_\_\_\_ %

On a typical **weekend/public holiday in the last 7 days**: \_\_\_\_ %

### Segment III: Child and Parent information

#### Your child information

13. Child's sex: Male ☐ Female ☐

14. Child's age: \_\_\_\_\_ year(s) \_\_\_\_\_ month(s)

15. Estimated child's height: \_\_\_\_\_ cm

weight: \_\_\_\_\_ kg

16. Does your child wear spectacles?

No ☐

Yes ☐

#### *Sleep duration*

17. In the last 7 days, what is the average duration of your child's **night-time** sleep?

Weekday: \_\_\_\_\_ hour(s) \_\_\_\_\_ min(s)

Weekend/ public holiday: \_\_\_\_\_ hour(s) \_\_\_\_\_ min(s)

#### *Sleep quality*

18. In the last 7 days, how would you rate your child's overall quality of sleep?

*Examples of poor sleep: Wakes up at night, difficulty waking up in the morning, nightmares*

*Examples of good sleep: Falls asleep easily at bedtime, uninterrupted sleep*

|                         | Unsatisfactory | Below Average | Average | Above Average | Excellent |
|-------------------------|----------------|---------------|---------|---------------|-----------|
| Weekday                 |                |               |         |               |           |
| Weekend/ public holiday |                |               |         |               |           |

Parent/ legal guardian information

19. Relationship to child:

- Mother ☐
- Father ☐
- Grandmother ☐
- Grandfather ☐
- Legal guardian ☐ (please specify): \_\_\_\_\_

20. My age is: \_\_\_\_\_ year(s) \_\_\_\_\_ month(s)

21. My estimated height is \_\_\_\_\_ cm

weight is \_\_\_\_\_ kg

22. Estimated monthly household income:

- \$0 - \$2500 ☐
- \$2501 - \$5000 ☐
- \$5001 - \$8000 ☐
- \$8001 - \$12000 ☐
- \$12001 - \$20000 ☐
- \$20001 and above ☐

23. Highest education attained (parent/ legal guardian completing survey)

- No formal education ☐
- Primary school ☐
- Secondary school ☐
- Post-secondary institution (JC, ITE, Polytechnic) ☐
- University - Bachelor degree ☐
- University - Post-graduate degree (Masters and above) ☐

24. Nationality:

Singapore citizen ☐

Singapore PR ☐

Non-Singapore citizen ☐

25. Ethnicity:

Chinese ☐

Malay ☐

Indian ☐

Eurasian ☐

Others ☐ (Please specify): \_\_\_\_\_

The next segment is Paediatric Quality of Life.

Before proceeding to the final segment, which age group does your child fall under?

☐ 2-4 years

☐ 5-6 years

## Segment IV: Paediatric Quality of Life

(2-4 years version)

### DIRECTIONS

On the following page is a list of things that might be a problem for **your child**. Please tell us **how much of a problem** each one has been for **your child** during the **past 7 days** by circling:

- 0 if it is **never** a problem
- 1 if it is **almost never** a problem
- 2 if it is **sometimes** a problem
- 3 if it is **often** a problem
- 4 if it is **almost always** a problem

There are no right or wrong answers.  
If you do not understand a question, please ask for help.

*In the **past 7 days**, how much of a **problem** has your child had with ...*

| PHYSICAL FUNCTIONING ( <i>problems with...</i> ) | Never | Almost Never | Some-times | Often | Almost Always |
|--------------------------------------------------|-------|--------------|------------|-------|---------------|
| 1. Walking                                       | 0     | 1            | 2          | 3     | 4             |
| 2. Running                                       | 0     | 1            | 2          | 3     | 4             |
| 3. Participating in active play or exercise      | 0     | 1            | 2          | 3     | 4             |
| 4. Lifting something heavy                       | 0     | 1            | 2          | 3     | 4             |
| 5. Bathing                                       | 0     | 1            | 2          | 3     | 4             |
| 6. Helping to pick up his or her toys            | 0     | 1            | 2          | 3     | 4             |
| 7. Having hurts or aches                         | 0     | 1            | 2          | 3     | 4             |
| 8. Low energy level                              | 0     | 1            | 2          | 3     | 4             |

| EMOTIONAL FUNCTIONING ( <i>problems with...</i> ) | Never | Almost Never | Some-times | Often | Almost Always |
|---------------------------------------------------|-------|--------------|------------|-------|---------------|
| 1. Feeling afraid or scared                       | 0     | 1            | 2          | 3     | 4             |
| 2. Feeling sad or blue                            | 0     | 1            | 2          | 3     | 4             |
| 3. Feeling angry                                  | 0     | 1            | 2          | 3     | 4             |
| 4. Trouble sleeping                               | 0     | 1            | 2          | 3     | 4             |
| 5. Worrying                                       | 0     | 1            | 2          | 3     | 4             |

PedsQL™, Copyright © 1998 JW Varni, Ph.D. All rights reserved.

PedsQL™ contact information and permission to use: Mapi Research Trust, Lyon, France – Internet: <https://eprovide.mapi-trust.org> and [www.pedsql.org/index.html](http://www.pedsql.org/index.html)

SMALLQ® is trademarked in 2018 under Class 41 TM120494  
c/o Professor Michael Chia, National Institute of Education, Nanyang Technological University, Singapore.

| <b>SOCIAL FUNCTIONING (<i>problems with...</i>)</b>                | <b>Never</b> | <b>Almost<br/>Never</b> | <b>Some-<br/>times</b> | <b>Often</b> | <b>Almost<br/>Always</b> |
|--------------------------------------------------------------------|--------------|-------------------------|------------------------|--------------|--------------------------|
| 1. Playing with other children                                     | 0            | 1                       | 2                      | 3            | 4                        |
| 2. Other kids not wanting to play with him/ her                    | 0            | 1                       | 2                      | 3            | 4                        |
| 3. Getting teased by other children                                | 0            | 1                       | 2                      | 3            | 4                        |
| 4. Not able to do things that other children his or her age can do | 0            | 1                       | 2                      | 3            | 4                        |
| 5. Keeping up when playing with other children                     | 0            | 1                       | 2                      | 3            | 4                        |

| <b>SCHOOL FUNCTIONING (<i>problems with...</i>)</b>        | <b>Never</b> | <b>Almost<br/>Never</b> | <b>Some-<br/>times</b> | <b>Often</b> | <b>Almost<br/>Always</b> |
|------------------------------------------------------------|--------------|-------------------------|------------------------|--------------|--------------------------|
| 1. Doing the same school activities with peers             | 0            | 1                       | 2                      | 3            | 4                        |
| 2. Missing school/ daycare because of not feeling well     | 0            | 1                       | 2                      | 3            | 4                        |
| 3. Missing school/ daycare to go to the doctor or hospital | 0            | 1                       | 2                      | 3            | 4                        |

PedsQL™, Copyright © 1998 JW Varni, Ph.D. All rights reserved.

PedsQL™ contact information and permission to use: Mapi Research Trust, Lyon, France – Internet: <https://eprovide.mapi-trust.org> and [www.pedsql.org/index.html](http://www.pedsql.org/index.html)

## Segment IV: Paediatric Quality of Life

(5-6 years version)

### DIRECTIONS

On the following page is a list of things that might be a problem for **your child**. Please tell us **how much of a problem** each one has been for **your child** during the **past 7 days** by circling:

- 0 if it is **never** a problem
- 1 if it is **almost never** a problem
- 2 if it is **sometimes** a problem
- 3 if it is **often** a problem
- 4 if it is **almost always** a problem

There are no right or wrong answers.  
If you do not understand a question, please ask for help.

*In the **past 7 days**, how much of a **problem** has your child had with ...*

| <b>PHYSICAL FUNCTIONING (problems with...)</b>   | <b>Never</b> | <b>Almost Never</b> | <b>Some-times</b> | <b>Often</b> | <b>Almost Always</b> |
|--------------------------------------------------|--------------|---------------------|-------------------|--------------|----------------------|
| 1. Walking more than one block                   | 0            | 1                   | 2                 | 3            | 4                    |
| 2. Running                                       | 0            | 1                   | 2                 | 3            | 4                    |
| 3. Participating in sports activity or exercise  | 0            | 1                   | 2                 | 3            | 4                    |
| 4. Lifting something heavy                       | 0            | 1                   | 2                 | 3            | 4                    |
| 5. Taking a bath or shower by him or herself     | 0            | 1                   | 2                 | 3            | 4                    |
| 6. Doing chores, like picking up his or her toys | 0            | 1                   | 2                 | 3            | 4                    |
| 7. Having hurts or aches                         | 0            | 1                   | 2                 | 3            | 4                    |
| 8. Low energy level                              | 0            | 1                   | 2                 | 3            | 4                    |

| <b>EMOTIONAL FUNCTIONING (problems with...)</b>  | <b>Never</b> | <b>Almost Never</b> | <b>Some-times</b> | <b>Often</b> | <b>Almost Always</b> |
|--------------------------------------------------|--------------|---------------------|-------------------|--------------|----------------------|
| 1. Feeling afraid or scared                      | 0            | 1                   | 2                 | 3            | 4                    |
| 2. Feeling sad or blue                           | 0            | 1                   | 2                 | 3            | 4                    |
| 3. Feeling angry                                 | 0            | 1                   | 2                 | 3            | 4                    |
| 4. Trouble sleeping                              | 0            | 1                   | 2                 | 3            | 4                    |
| 5. Worrying about what will happen to him or her | 0            | 1                   | 2                 | 3            | 4                    |

PedsQL™, Copyright © 1998 JW Varni, Ph.D. All rights reserved.

SMALLQ® is trademarked in 2018 under Class 41 TM120494

c/o Professor Michael Chia, National Institute of Education, Nanyang Technological University, Singapore.

PedsQL™ contact information and permission to use: Mapi Research Trust, Lyon, France – Internet: <https://eprovide.mapi-trust.org> and [www.pedsq.org/index.html](http://www.pedsq.org/index.html)

| <b>SOCIAL FUNCTIONING (<i>problems with...</i>)</b>                | <b>Never</b> | <b>Almost<br/>Never</b> | <b>Some-<br/>times</b> | <b>Often</b> | <b>Almost<br/>Always</b> |
|--------------------------------------------------------------------|--------------|-------------------------|------------------------|--------------|--------------------------|
| 1. Getting along with other children                               | 0            | 1                       | 2                      | 3            | 4                        |
| 2. Other kids not wanting to be his or her friend                  | 0            | 1                       | 2                      | 3            | 4                        |
| 3. Getting teased by other children                                | 0            | 1                       | 2                      | 3            | 4                        |
| 4. Not able to do things that other children his or her age can do | 0            | 1                       | 2                      | 3            | 4                        |
| 5. Keeping up when playing with other children                     | 0            | 1                       | 2                      | 3            | 4                        |

| <b>SCHOOL FUNCTIONING (<i>problems with...</i>)</b> | <b>Never</b> | <b>Almost<br/>Never</b> | <b>Some-<br/>times</b> | <b>Often</b> | <b>Almost<br/>Always</b> |
|-----------------------------------------------------|--------------|-------------------------|------------------------|--------------|--------------------------|
| 1. Paying attention in class                        | 0            | 1                       | 2                      | 3            | 4                        |
| 2. Forgetting things                                | 0            | 1                       | 2                      | 3            | 4                        |
| 3. Keeping up with school activities                | 0            | 1                       | 2                      | 3            | 4                        |
| 4. Missing school because of not feeling well       | 0            | 1                       | 2                      | 3            | 4                        |
| 5. Missing school to go to the doctor or hospital   | 0            | 1                       | 2                      | 3            | 4                        |

PedsQL™, Copyright © 1998 JW Varni, Ph.D. All rights reserved.

PedsQL™ contact information and permission to use: Mapi Research Trust, Lyon, France – Internet: <https://eprovide.mapi-trust.org> and [www.pedsq.org/index.html](http://www.pedsq.org/index.html)

**Impact of COVID-19 situation:**

Parent's habits

26. **In the last 7 days**, the COVID-19 situation has led to an **increase** in **my** digital media engagement.

(a) Weekday:

|                   |          |         |       |                |
|-------------------|----------|---------|-------|----------------|
| Strongly disagree | Disagree | Neutral | Agree | Strongly Agree |
| 1                 | 2        | 3       | 4     | 5              |

(b) Weekend:

|                   |          |         |       |                |
|-------------------|----------|---------|-------|----------------|
| Strongly disagree | Disagree | Neutral | Agree | Strongly Agree |
| 1                 | 2        | 3       | 4     | 5              |

Child's habits

27. How has your child's average daily time spent on the following activities changed from before COVID-19 compared to the present (think of the last 7 days)?

|                                                                                                     | Significantly increased | Slightly increased | About the same | Slightly decreased | Significantly decreased |
|-----------------------------------------------------------------------------------------------------|-------------------------|--------------------|----------------|--------------------|-------------------------|
| Screen use (computer, smartphone, tablets, TV-viewing)                                              |                         |                    |                |                    |                         |
| Physical activity (indoor & outdoor play, moving from one place to another, playing physical games) |                         |                    |                |                    |                         |
| Outdoor activity (outdoor                                                                           |                         |                    |                |                    |                         |

|                                                   |  |  |  |  |  |
|---------------------------------------------------|--|--|--|--|--|
| play, exercise<br>or sport)                       |  |  |  |  |  |
| Total sleep<br>(inclusive of<br>day-time<br>naps) |  |  |  |  |  |
| Quality of Life                                   |  |  |  |  |  |

- End of Survey -

*Thank you*
